# Supplementary material for: Artificial-Intelligence-Assisted Discovery of Genetic Factors for Precision Medicine of Antiplatelet Therapy in Diabetic Peripheral Artery Disease
Source: MDPI journal article supplement (doi:10.3390/biomedicines10010116), 2022-01-06
Supplement: s1 [file s1]

## **Supplementary information**

### **Artificial intelligence-assisted discovery of genetic factors for precision medicine of antiplatelet therapy in diabetic peripheral artery disease**

Chi-Hsiao Yeh<sup>1,2,3</sup>, Yi-Ju Chou<sup>4</sup>, Tsung-Hisen Tsai<sup>5</sup>, Paul Wei-Che Hsu<sup>4</sup>, Chun-Hsien Li<sup>5</sup>,

Yun-Hsuan Chan<sup>5</sup>, Shih-Feng Tsai<sup>4</sup>, Soh-Chin Ng<sup>6</sup>, Kuei-Mei Chou<sup>6</sup>, Yu-Ching Lin<sup>2,7</sup>,

Yu-Hsiang Juan<sup>2,7</sup>, Tieh-Cheng Fu<sup>2,8</sup>, Chi-Chun Lai<sup>2,3,9\*</sup>, Huey-Kang Sytwu<sup>10,11\*</sup>,

Ting-Fen Tsai<sup>4,12,13\*</sup>

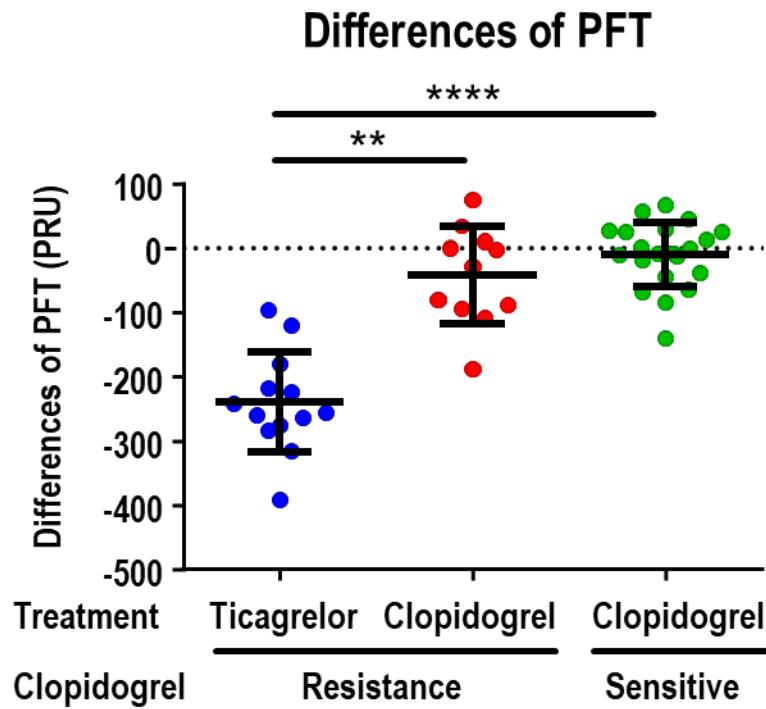

**Supplementary Figure S1.** The differences of PFT after 36-month ticagrelor or clopidogrel treatment in clopidogrel sensitive and resistant patients. PFT, platelet function test; PRU, platelet reactivity unit. \*\*,  $p < 0.01$  \*\*\*\*,  $p < 0.0001$

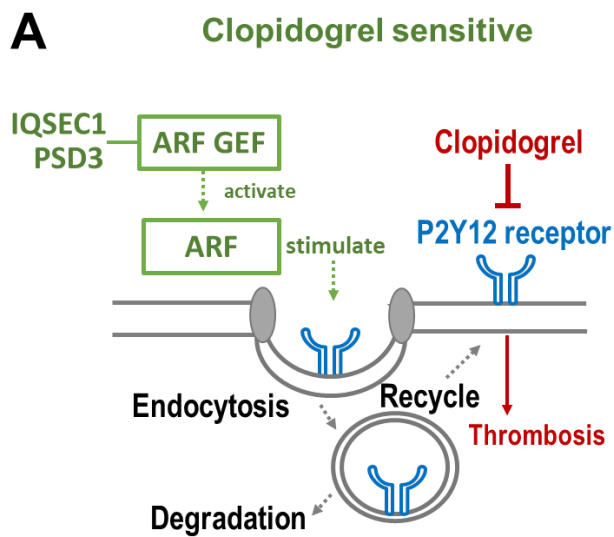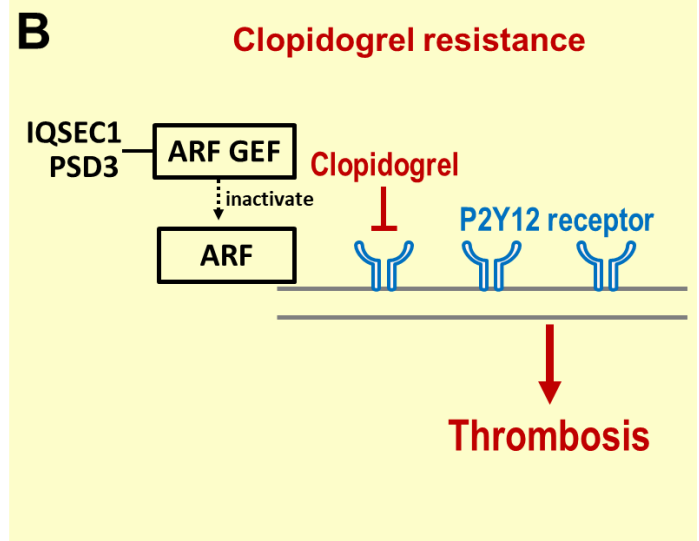

**Supplement Figure S2. The potential pathway of P2Y<sub>12</sub> receptors recycling by endocytosis.** (A) Activation of the P2Y<sub>12</sub> receptors stimulates ADP ribosylation factor 6 (ARF6) activity, which facilitates dynamin-dependent fission of clathrin-coated vesicles and subsequently there is internalization, which is an essential factor needed for platelet activation. Clopidogrel acts as antagonists of P2Y<sub>12</sub> to prevent thrombosis. (B) A Blockade of receptor internalization or subsequent recycling by specific mutations will diminish receptor resensitization within the human platelets of individuals with bleeding disorders. Furthermore, the efficiency of clopidogrel may be decreased under this situation.

**Supplementary Table S1. Characteristics of patients with or without  
fibrate medication**

| <b>Fibrate</b>                   | <b>No (n=39)</b> | <b>Yes (n=6)</b> | <b>p</b> |
|----------------------------------|------------------|------------------|----------|
| <b>Age (year)</b>                | 65.0 ± 6.7       | 65.0 ± 8.1       | .352     |
| <b>Body weight (Kg)</b>          | 67.3 ± 12.4      | 77.7 ± 15.0      | .400     |
| <b>HbA1c (%)</b>                 | 8.0 ± 1.6        | 8.1 ± 1.7        | .961     |
| <b>PFT at baseline(PRU)</b>      | 237.5 ± 79.7     | 271.5 ± 115.9    | .095     |
| <b>Creatinine (mg/dL)</b>        | 1.4 ± 0.7        | 1.9 ± 0.3        | .101     |
| <b>LDL (mg/dL)</b>               | 87.4 ± 37.7      | 85.8 ± 20.2      | .530     |
| <b>Total Cholesterol (mg/dL)</b> | 156.0 ± 39.8     | 168.3 ± 18.9     | .274     |
| <b>Triglyceride (mg/dL)</b>      | 173.5 ± 99.8     | 188.8 ± 120.7    | .308     |
| <b>CVA (n, %)</b>                | 5 (12.8%)        | 0 (0%)           | 1.0      |
| <b>CAD (n, %)</b>                | 12 (30.8%)       | 1 (16.7%)        | .656     |
| <b>Statin (n, %)</b>             | 33 (84.6%)       | 3 (50.0%)        | .084     |
| <b>Ezetimibe (n, %)</b>          | 8 (20.5%)        | 2 (33.3%)        | .601     |

Values are mean ± SD or n (%). CAD, Coronary artery disease; CVA, cerebrovascular disease; PFT, platelet function test; PRU, Platelet (P2Y<sub>12</sub>) reaction units.

**Supplementary Table S2. Top 20 important features**

| Rank | Feature (SNP) | Count | position        | gene                                                    | Protein<br>Connectivity<br>map |
|------|---------------|-------|-----------------|---------------------------------------------------------|--------------------------------|
| 1    | rs10918666    | 222   | chr1:167208924  | None                                                    |                                |
| 2    | rs7555243     | 209   | chr1:185325621  | GS1-279B7.1: Intron Variant                             |                                |
| 3    | rs3808996     | 156   | chr11:125086402 | SLC37A2: Intron Variant                                 |                                |
| 4    | rs734525      | 135   | chr3:12907528   | IQSEC1: Intron Variant;<br>LOC105376956: Intron Variant | V                              |
| 5    | rs11111138    | 122   | chr12:102027512 | WASHC3: Intron Variant                                  |                                |
| 6    | rs2632841     | 118   | chr8:18814273   | PSD3: Intron Variant                                    | V                              |
| 7    | rs4853810     | 113   | chr2:2936195    | LINC01250: Intron Variant                               |                                |
| 8    | rs1917098     | 100   | chr3: 78255075  | None                                                    |                                |
| 9    | rs9650076     | 99    | chr8: 119121033 | None                                                    |                                |
| 10   | rs6030731     | 87    | chr20: 43252271 | None                                                    |                                |
| 11   | rs9576776     | 86    | chr13: 39321269 | None                                                    |                                |
| 12   | rs6922617     | 84    | chr6: 41368386  | None                                                    |                                |
| 13   | rs34773782    | 80    | chr14:93248234  | BTBD7: Intron Variant                                   | V                              |
| 14   | Affx-33778007 | 78    | chr9:4036449    | GLIS3: Intron Variant                                   | V                              |
| 15   | rs3758726     | 76    | chr11:45220030  | PRDM11: Intron Variant                                  |                                |
| 16   | rs74834148    | 76    | chr7: 56257428  | None                                                    |                                |
| 17   | Affx-23639462 | 73    | chr4: 150375232 | LRBA: Intron Variant                                    | V                              |
| 18   | rs6691208     | 72    | chr1: 3014763   | None                                                    |                                |
| 19   | rs6454674     | 70    | chr6: 88163211  | CNR1: Intron Variant                                    |                                |
| 20   | rs7545995     | 70    | chr1: 3053769   | None                                                    |                                |

**Supplementary Table S3. Top 8 annotated genes and the functions**

| <b>Ran<br/>k</b> | <b>SNP</b>    | <b>gene</b> | <b>Expression of organ</b>                                    | <b>Function</b>                                                                                        |
|------------------|---------------|-------------|---------------------------------------------------------------|--------------------------------------------------------------------------------------------------------|
| 1                | rs3808996     | SLC37A2     | Proximal GI tract, bone marrow and lymphoid tissues           | Inorganic phosphate and glucose-6-phosphate antiporter.                                                |
| 2                | rs734525      | IQSEC1      | All tissues                                                   | control of vesicle formation by endocytosis cargo                                                      |
| 3                | rs11111138    | WASHC3      | All tissues, especially smooth muscle and epithelial tissues. | nucleation-promoting factor (NPF) at the surface of endosomes                                          |
| 4                | rs2632841     | PSD3        | All tissues, especially brain                                 | Endocytosis                                                                                            |
| 5                | rs4853810     | LINC01250   |                                                               | Long non-coding RNA mediator of epithelial dynamics and organ branching by promoting cleft progression |
| 6                | rs34773782    | BTBD7       | All tissues                                                   | repressor and activator of transcription                                                               |
| 7                | Affx-33778007 | GLIS3       | All tissues                                                   | involved in transcription regulation                                                                   |
| 8                | rs3758726     | PRDM11      | All tissues                                                   |                                                                                                        |

Supplementary Table S4.

| First Author (year)               | Type                             | Patient population | intervention                                                       | Subgroups Reported                             | Ischemic Outcome              | Platelet reactivity (% of resistance) | Maximum FU (months) | Mean Age (yrs) | DM (%) | Asian patients % (n)          |
|-----------------------------------|----------------------------------|--------------------|--------------------------------------------------------------------|------------------------------------------------|-------------------------------|---------------------------------------|---------------------|----------------|--------|-------------------------------|
| Hiatt et al (2017) <sup>69</sup>  | RCT (EUCLID)                     | Symptomatic PAD    | Ticagrelor (90 mg bid) vs Clopidogrel (75 mg QD)                   | CYP2C19, exclude poor, LOF (42.1%) and non-LOF | MACE                          | N/A                                   | 36                  | 66             | 38.5%  | 11.5% (1602/13885)            |
| Patel et al (2020) <sup>51</sup>  | RCT (Post-hoc analysis of PLATO) | ACS+PAD            | Aspirin/Ticagrelor (90 mg bid) vs Aspirin /Clopidogrel (75 mg QD)  | None                                           | MACE                          | N/A                                   | 12                  | 66             | 37.7%  | <4.5% non-Caucasian (51/1144) |
| Bonaca et al (2016) <sup>48</sup> | RCT (PEGASUS-TIMI 54)            | MI+PAD             | Aspirin/Ticagrelor (90 mg or 60 mg bid) vs Aspirin                 | none                                           | MACE                          | N/A                                   | 36                  | 66             | 42.17% | <4.3% (49/1143)               |
| Ducci et al (2020) <sup>19</sup>  | RCT                              | PAD+stent          | Aspirin/Ticagrelor (90 mg bid) vs Aspirin /Clopidogrel (75 mg QD)  |                                                | Target limb revascularization | PFT (by PRU)                          | 12                  | 71-74          | 67.5%  | N/A (40)                      |
| Yang et al (2018) <sup>52</sup>   | RCT                              | PAD+stent          | Aspirin/Ticagrelor (90 mg bid) vs Aspirin / Clopidogrel (75 mg QD) | N/A                                            | white thrombus                | N/A                                   | 6                   | 60-71          | 50%    | N/A (18)                      |
| Lee et al. (2019) <sup>30</sup>   | Retrospective                    | PAD+stent          | Clopidogrel (75 mg QD)                                             | LOF (44.9%) and non-LOF                        | Amputation free survival      | VerifyNow (55.8%)                     | 12                  | 72             | 76.9%  | 100% (278)                    |
| Guo et al. (2014) <sup>49</sup>   | observational                    | PAD+endovascular   | Aspirin (100 mg QD)/ Clopidogrel (75                               | LOF (52%) and non-LOF                          |                               | N/A                                   | 12                  | 73-74          | 42%    | 100% (50)                     |

|                                                |                   | therapy                              | mg QD)                                               |     |                                                        |     |                            |      |       |              |
|------------------------------------------------|-------------------|--------------------------------------|------------------------------------------------------|-----|--------------------------------------------------------|-----|----------------------------|------|-------|--------------|
| Spiliopoul<br>os et al<br>(2013) <sup>32</sup> | observatio<br>nal | PAD+en<br>dovasca<br>ular<br>therapy | Aspirin (100 mg<br>QD)/<br>Clopidogrel (75<br>mg QD) | N/A | death,<br>bleeding,<br>major<br>amputatio<br>n, or TLR | N/A | 12                         | 68.5 | 57%   | N/A<br>(100) |
| Pastromas<br>et al<br>(2013) <sup>50</sup>     | observatio<br>nal | PAD+en<br>dovasca<br>ular<br>therapy | Aspirin (100 mg<br>QD)/<br>Clopidogrel (75<br>mg QD) | N/A | TLR-free<br>survival                                   | N/A | 96 (mean<br>27.7+22.9<br>) | 69   | 56.6% | N/A<br>(113) |
